# Supplementary material for: Degradation of chemical warfare agents over cotton fabric functionalized with UiO-66-NH2
Source: Royal Society of Chemistry journal article supplement (doi:10.1039/c8ra06805d), 2018-01-01
Supplement: c8ra06805d1.pdf [file c8ra06805d1.pdf]

Electronic Supplementary Information (ESI) for Chem. Comm.  
This journal is © The Royal Society of Chemistry 2018

## Degradation of chemical warfare agents over cotton fabric functionalized with UiO-66-NH<sub>2</sub>

Min-kun Kim,<sup>‡</sup> Sung Hoon Kim,<sup>‡</sup> Myungkyu Park, Sam Gon Ryu\* and Hyunsook Jung\*

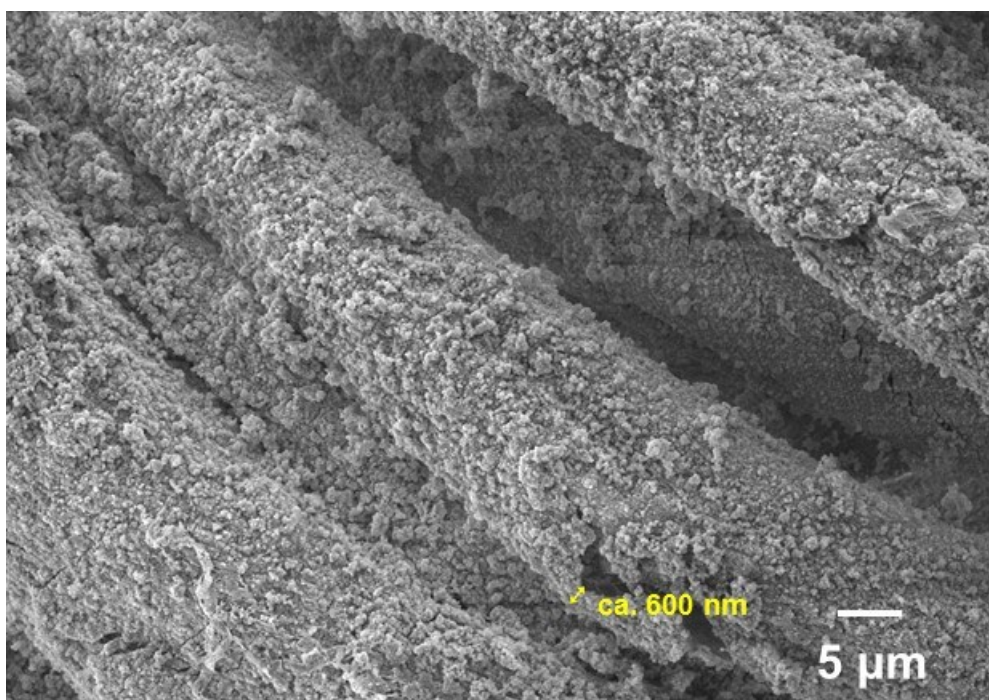

**Fig. S1.** SEM image showing the thickness of UiO-66-NH<sub>2</sub> layer (height of the MOF layer)

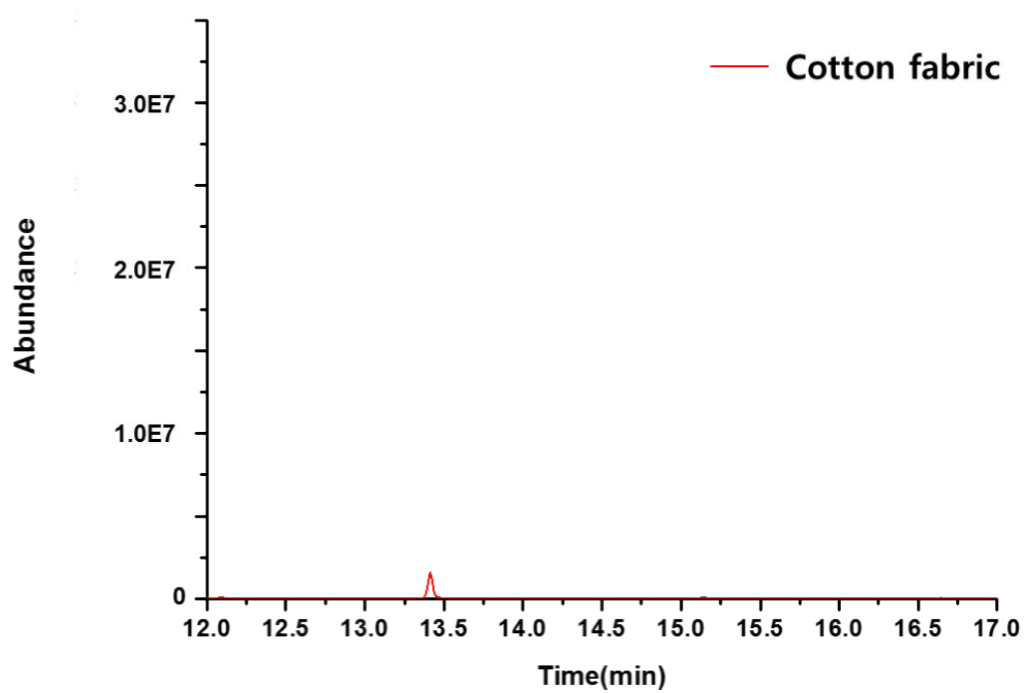

**Fig. S2.** Extraction of GD from pristine cotton fabric after AVLAG swatch test.

(a)

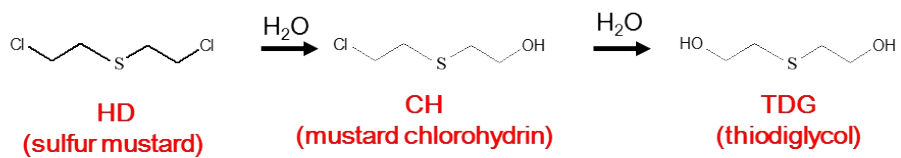

(b)

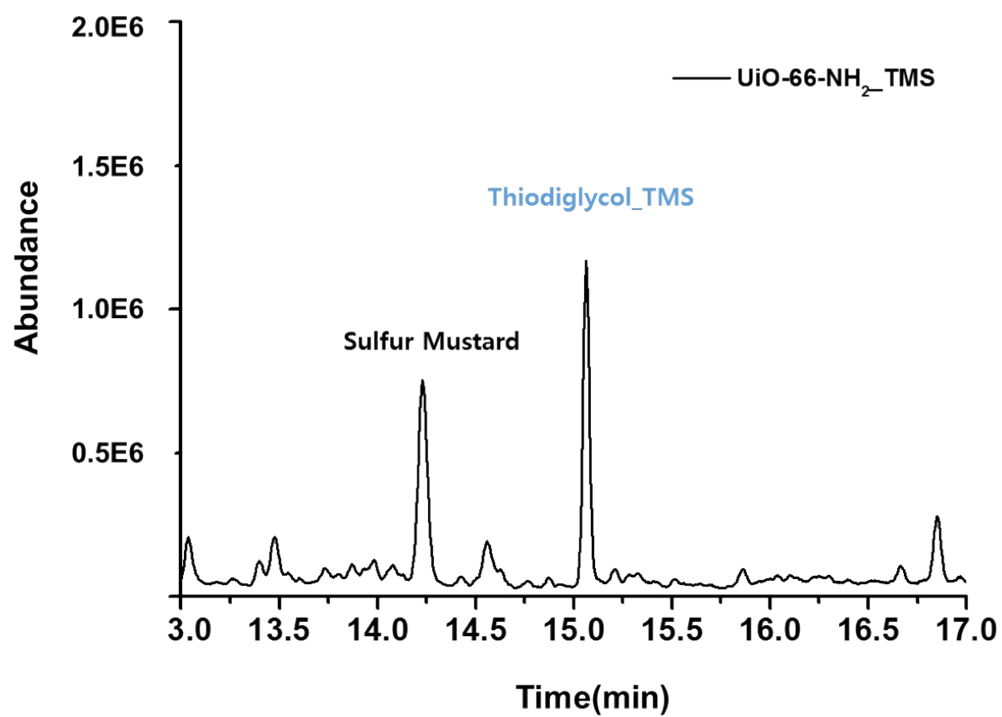

**Fig. S3.** (a) Hydrolysis pathway of HD and (b) GC/MS spectrum of HD degraded by UiO-66-NH<sub>2</sub> particles.
